# Supplementary material for: Impaired telomere integrity and rRNA biogenesis in PARN‐deficient patients and knock‐out models
Source: PubMed Central journal article supplement (PMC6609912; doi:10.15252/emmm.201810201), 2019-06-06
Supplement: EMMM-11-e10201-s001.pdf [file EMMM-11-e10201-s001.pdf]

Appendix files

**Impaired telomere integrity and rRNA biogenesis in  
PARN-deficient patients and knock-out models**

Table of content:

|                               |         |
|-------------------------------|---------|
| Appendix Figure S1.....       | page 2  |
| Appendix Figure S2.....       | page 3  |
| Appendix Figure S3.....       | page 4  |
| Appendix Figure S4.....       | page 5  |
| Appendix Figure S5.....       | page 6  |
| Appendix Figure S6.....       | page 7  |
| Appendix Table S1.....        | page 8  |
| Appendix Table S2.....        | page 9  |
| Supplementary References..... | page 10 |

**Appendix Figure S1**

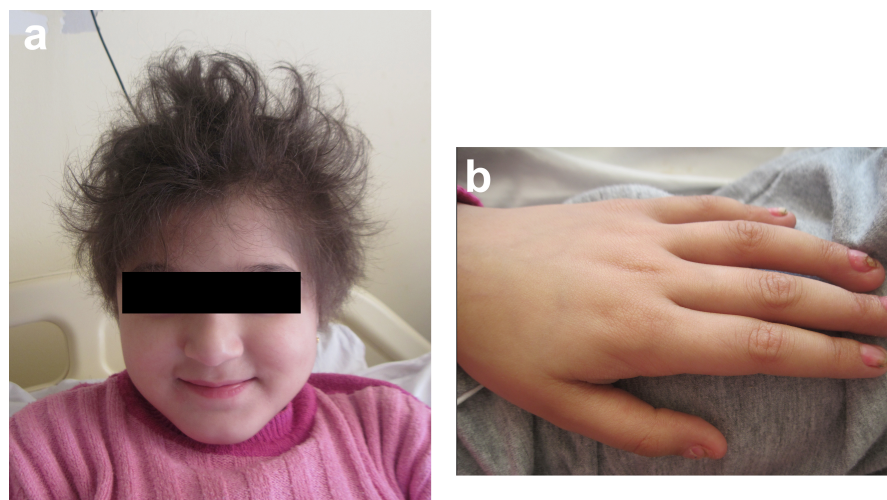

**Appendix Figure S1.** Pictures showing coarse hairs **(a)** and nail dystrophy **(b)** in individual P1.

Appendix Figure S2

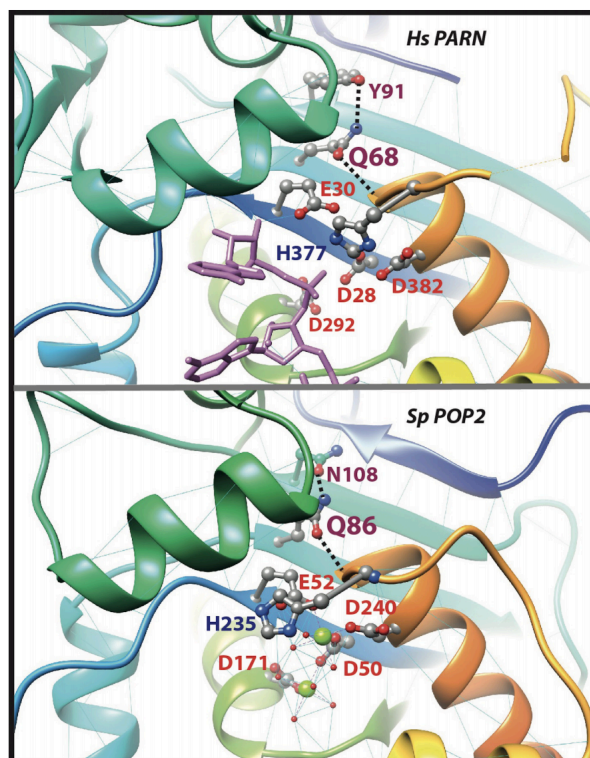

**Appendix Figure S2.** The active site of human PARN in complex with RNA (purple) (upper panel, pdb 2A1R (Wu et al, 2005)) is compared to the active site of *S. pombe* POP2 (lower panel, pdb 2P51 (Jonstrup et al, 2007)). Mg<sup>2+</sup>: green balls; water: red balls. Three aspartate (Hs PARN D28, D292, D382; Sp POP2 D50, D171, D240) and one glutamate (Hs PARN E30; Sp POP2 E52) residues play crucial roles for the hydrolytic reaction mechanism of the DEDDh subfamily of nucleases as the four acidic residues, by coordinating two divalent metal ions, ensure both the substrate binding and the interaction with a molecule of water essential for hydrolysis. The Nε2 atom of the conserved glutamine (Hs PARN Q68; Sp POP2 Q86) makes an H-bond with the oxygen atom of an amino acid of the neighbour β-strand (Hs PARN Y91 OH; Sp POP2 N108 Oδ1), whereas the Oε1 atom of the same glutamine residue is H-bonded to the N atom of the α-helix N-cap (Hs PARN A379; Sp POP2 A237), located between the catalytic histidine (Hs PARN H377; Sp POP2 H235) and the last aspartic acid (Hs PARN D382; Sp POP2 D240). This last H-bond is likely to play a crucial role in the configuration of the active site, and the p.Gln68His mutation is thus predicted to disturb catalytic activity. Figure made using Chimera (Pettersen et al, 2004).

Appendix Figure S3

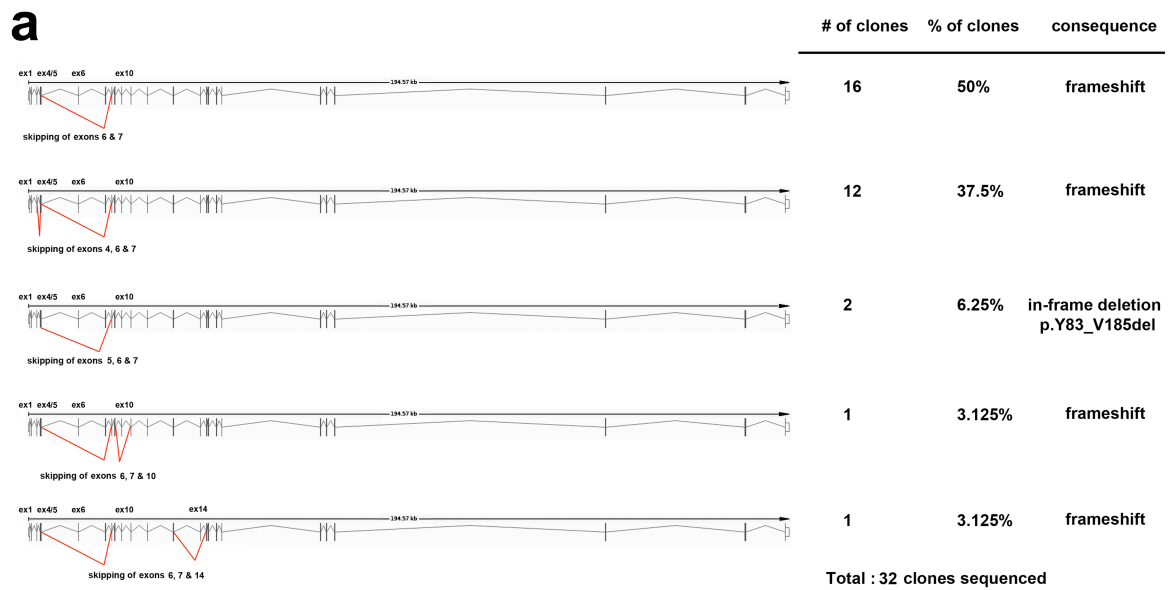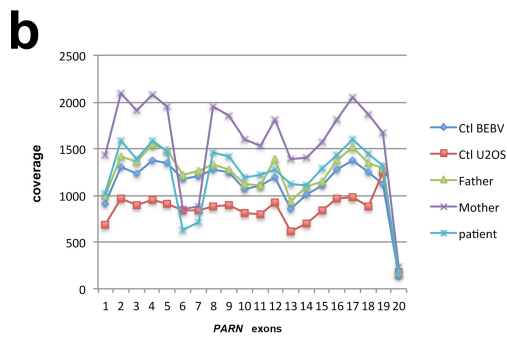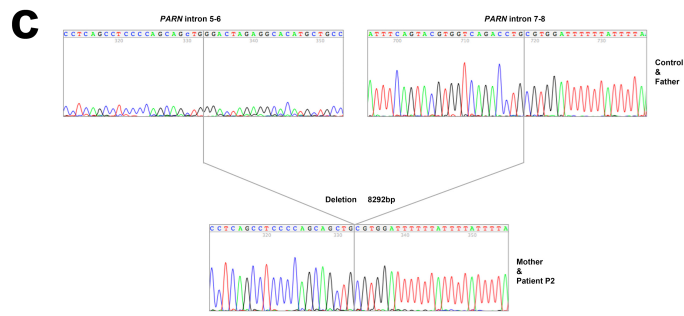

**Appendix Figure S3. (a)** Splicing aberrations in *PARN* transcripts identified in P2’s cells. *PARN* cDNA in patient’s cells was PCR amplified, cloned and sequenced. The main splicing events and their frequencies are indicated. 32 independent clones were analyzed. **(b)** Coverage analysis performed by high throughput sequencing of the whole *PARN* gene sequence (promoter, introns, exons) revealed a two-fold reduction of a genomic region encompassing the *PARN* exons 6 and 7 in P2 and her mother. **(c)** Sanger sequencing of the boundaries of the deleted region in P2.

Appendix Figure S4

**a**

RNA guide targeting PARN exon2 : CCGACTTCTTCGCCATCGAT

**b**

clone 2-H

Allele #1: del1bp + 1substitution

```

191 ttctccgagATTTTAAGAGTAATCTTCAAAAGTGTACAGGCCATAGAGGAGCCCGACTTCTTCGCCATCGATGGGAGCTTTTCAGgtateccctccct 290 WT
301 TTCTCCGCAGATTTTAAGAGTAATCTTCAAAAGTGTACAGGCCATAGAGGAGGCCACTTCTTCGCCA-GGATGGGGAGTTTTTCAGGTATCCCTCCCT 399 clone 2-H Allele #1
    
```

Allele #2: insertion 1bp

```

191 ttctccgagATTTTAAGAGTAATCTTCAAAAGTGTACAGGCCATAGAGGAGCCCGACTTCTTCGCCATCG-ATGGGAGCTTTTCAGgtateccctccct 289 WT
301 TTCTCCGCAGATTTTAAGAGTAATCTTCAAAAGTGTACAGGCCATAGAGGAGGCCACTTCTTCGCCATCGGATGGGGAGTTTTTCAGGTATCCCTCCCT 400 clone 2-H Allele #2
    
```

**c**

```

1 atg gag ata atc agg agc aat ttt aag agt aat ctt cac aaa gtg tac cag gcc ata gag
1 M E I I R S N F K S N L H K V Y Q A I E
61 gag gcc gac ttc ttc gcc atc gat ggg gag ttt tca gga atc agt gat gga cct tca gtc
21 E A D F F A I D G E F S G I S D G P S V
121 tct gca tta aca aat ggt ttt gac act cca gaa gag agg tat cag aag ctt aaa aag cat
41 S A L T N G F D T P E E R Y Q K L K K H
181 tcc atg gac ttt ttg cta ttt cag ttt ggc ctt tgc act ttt aag tat gac tac aca gat
61 S M D F L L F Q F G L C T F K Y D Y T D
241 tca aag tat ata acg aag tca ttt aac ttc tat gtt ttc ccg aaa ccc ttc aat aga tcc
81 S K Y I T K S F N F Y V F P K P F N R S
    
```

WT

```

1 atg gag ata atc agg agc aat ttt aag agt aat ctt cac aaa gtg tac cag gcc ata gag
1 M E I I R S N F K S N L H K V Y Q A I E
61 gag gcc gac ttc ttc gcc agg atg ggg agt ttt cag gaa tca gtg atg gac ctt cag tct
21 E A D F F A R M G S F Q E S V M D L Q S
121 ctg cat taa caa atg gtt ttg aca ctc cag aag aga ggt atc aga agc tta aaa agc att
41 L H * Q M V L T L Q K R G I R S L K S I
    
```

Allele #1

NM\_002582.3:c.83\_84del  
Chr16(GRCh37):g.14723467\_14723468del  
p.Asp28Glyfs\*8

HT1080

```

1 atg gag ata atc agg agc aat ttt aag agt aat ctt cac aaa gtg tac cag gcc ata gag
1 M E I I R S N F K S N L H K V Y Q A I E
61 gag gcc gac ttc ttc gcc atc gga tgg gga gtt ttc agg aat cag tga tgg acc ttc agt
21 E A D F F A I G W G V F R N Q * W T F S
121 ctc tgc att aac aaa tgg ttt tga cac tcc aga aga gag gta tca gaa gct taa aaa gca
41 L C I N K W F * H S R R E V S E A * K A
    
```

Allele #2

NM\_002582.3:c.83\_84insG  
Chr16(GRCh37):g.14723467\_14723468insC  
p.Asp28Glyufs\*9

PARN KO

clone 2-H

**d**

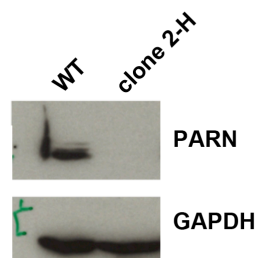

**Appendix Figure S4. (a)** Design of the gRNA used to create CRISPR/Cas9 mutations in the *PARN* coding sequence. **(b)** The HT1080<sup>PARNKO</sup> clone 2-H harbors a 1-bp deletion and a substitution resulting in a frameshift on one allele and 1bp –insertion, also resulting in a frameshift, on the other allele. The blue sequence represents the locus targeted by the gRNA. The pink sequence represents the PAM. **(c)** Premature stop codon generated by both mutations are indicated by red boxes. **(d)** Western Blot analysis confirming the PARN loss of function in HT1080<sup>PARNKO</sup> clone 2-H.

Appendix Figure S5

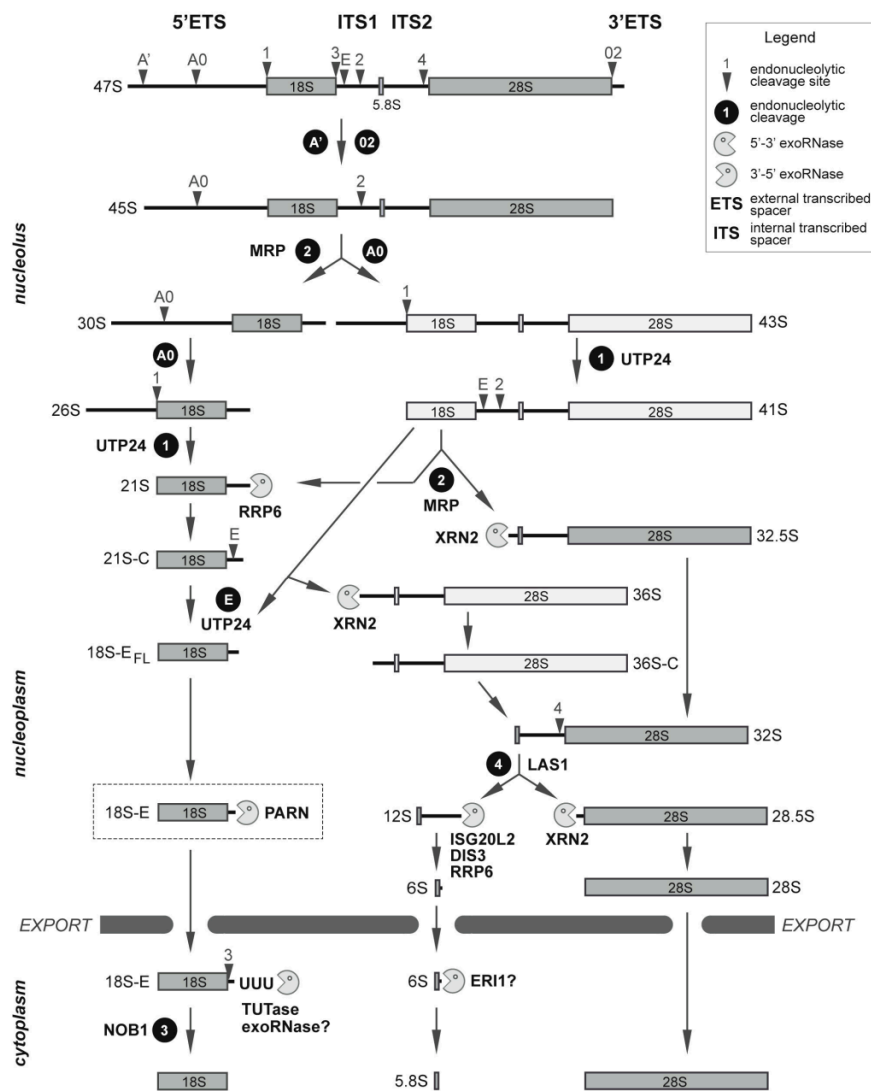

**Appendix Figure S5.** Ribosomal RNA processing in human cells. Three of the four rRNAs forming the backbones of the small and large ribosomal subunits arise from a long primary transcript (47S pre-rRNA), in which 18S, 5.8S and 28S rRNA sequences are flanked by external (5'ETS, 3'ETS) and internal transcribed spacers (ITS1, ITS2). These rRNAs are progressively released owing to endo- and exoribonucleases. Arrows displayed along the rRNA precursor sequences point out the positions of endonucleolytic cleavage sites. The sequential order of these cleavages defines major and minor, alternative pathways, giving rise to abundant precursors (depicted in grey) or rarer pre-rRNA species (depicted in white). When identified, endoribonucleases are labelled in black, and 5'-3' or 3'-5' exoribonucleases in grey. Question marks refer to putative enzymatic activities deduced from 3'RACE data (Montellese et al, 2017; O'Donohue et al, 2010), or to an RNase described in mouse whose human ortholog could fulfill similar functions (Ansel et al, 2008).

Appendix Figure S6

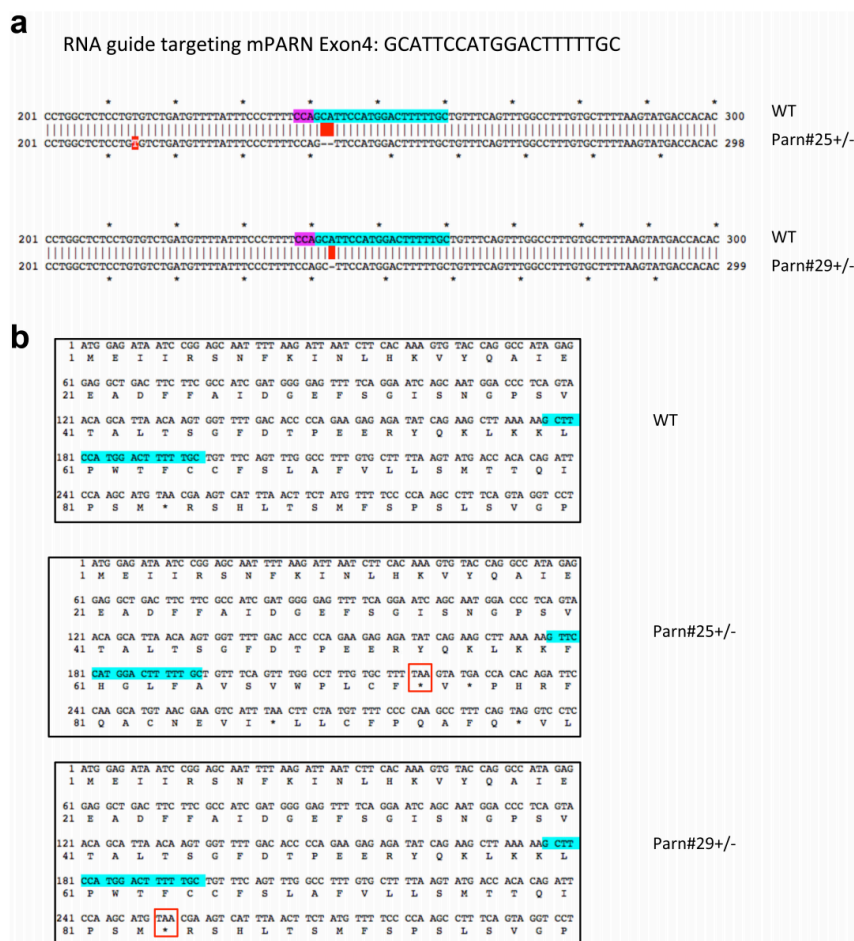

**Appendix Figure S6. (a)** Design of the gRNA used to create CRISPR/Cas9 mutations in the mouse *Parn* gene. The blue sequence represents the locus targeted by the gRNA. The pink sequence represents the PAM. **(b)** The Parn#25+/- and Parn#29+/- animal cell lines harbor, respectively, a 2-bp and a 1-bp deletion on one allele, resulting in frameshifts and premature stop codons indicated by red boxes.

**Appendix Table S1.** List of predicted off-target loci sequenced and found in Parn#25+/- and Parn#29+/- animals.

|                  |                              | <b>PAM + gRNA sequence</b>  |                            |                        |    |
|------------------|------------------------------|-----------------------------|----------------------------|------------------------|----|
|                  |                              | cca gcattccatggactttttgc    |                            |                        |    |
| <b>gene name</b> | <b>position</b>              | <b>number of mismatches</b> | <b>off-target sequence</b> | <b>Sanger sequence</b> |    |
| Gm17441/Tcte1    | chr17:45,679,275-45,679,297  | 3                           | cct gcactccaggactctttgc    |                        | WT |
| Abca1            | chr4:53,043,874-53,043,896   | 4                           | ccc tcattccaagcactttatgc   |                        | WT |
| Efcab5           | chr11:76,916,908-76,916,930  | 4                           | cct cgattccatggactttgtgt   |                        | WT |
| Olfr506          | chr7:115,755,996-115,756,018 | 4                           | cca tcatcccatgtacttttttc   |                        | WT |
| Olfr487          | chr7:115,355,846-115,355,868 | 4                           | cca tcatcccatgtacttttttc   |                        | WT |
| Olfr478          | chr7:115,175,660-115,175,682 | 4                           | cca tcatcccatgtacttttttc   |                        | WT |
| Garn13           | chr2:32,878,191-32,878,213   | 4                           | cca ggaattcaggactttttgc    |                        | WT |



**Appendix Table S2.** Primers used in this study.

| Primer name    | Sequence                     | Reference             |
|----------------|------------------------------|-----------------------|
| <b>ACTB-F</b>  | TGTACGCCAACACAGTGCTG         | Boros et al., 2014    |
| <b>ACTB-R</b>  | GCTGGAAGGTGGACAGCGA          | Tilman et al, 2009    |
| <b>hTR-F</b>   | TTTGTCTAACCCCTAACTAACTGAGAAG | Tilman et al, 2009    |
| <b>hTR-R</b>   | TTGCTCTAGAATGAACGGTGGA       | Tilman et al, 2009    |
| <b>POT1-F</b>  | TCAGTCTGTAAACTTCATTGCC       | Zaffaroni et al, 2005 |
| <b>POT1-R</b>  | TGCACCATCCTGAAAAATTATATCC    | Zaffaroni et al, 2005 |
| <b>TPP1-F</b>  | CCCGCAGAGTTCTATCTCCA         | Poncet et al, 2008    |
| <b>TPP1-R</b>  | GGACAGTGATAGGCCTGCAT         | Poncet et al, 2008    |
| <b>TRF2-F</b>  | GACCTTCCAGCAGAAGATGC         | Escoffier et al, 2005 |
| <b>TRF2-R</b>  | GTTGGAGGATTCCGTAGCTG         | Escoffier et al, 2005 |
| <b>TRF1-F</b>  | CCACATGATGGAGAAAATTAAGAGTTAT | Lin et al, 2006       |
| <b>TRF1-R</b>  | TGCCGCTGCCTTCATTAGA          | Lin et al, 2006       |
| <b>RAP1-F</b>  | CGGGGAACCACAGAATAAGA         | Poncet et al, 2008    |
| <b>RAP1-R</b>  | CTCAGGTGTGGGTGGATCAT         | Poncet et al, 2008    |
| <b>TIN2-F</b>  | GTCAGAGGCTCCTGTGGATT         | Abreu et al, 2010     |
| <b>TIN2-R</b>  | CAGTGCTTTCTCCAGCTGAC         | Abreu et al, 2010     |
| <b>RTEL1-F</b> | TCCCAAAGATTATTTACGCC         | Tummala et al, 2015   |
| <b>RTEL1-R</b> | TCTGTAGATGGTTACTCTCTTG       | Tummala et al, 2015   |
| <b>DKC1-F</b>  | CTGGAGTCATGAGTGAAAAG         | Tummala et al, 2015   |
| <b>DKC1-R</b>  | CTCATCCTTGTGGTTATCATAAC      | Tummala et al, 2015   |
| <b>p53-F</b>   | GAGGTTGGCTCTGACTGTACC        | Liu et al, 2015       |
| <b>p53-R</b>   | TCCGTCCCAGTAGATTACCAC        | Liu et al, 2015       |
| <b>p21-F</b>   | GCAGACCAGCATGACAGATTT        | Liu et al, 2013       |
| <b>p21-R</b>   | GGATTAGGGCTTCCTCTTGGA        | Liu et al, 2013       |
| <b>Xp-Yp-F</b> | GCAAAGAGTGAAAGAACGAAGCTT     | Porro et al, 2010     |
| <b>Xp-Yp-R</b> | CCCTCTGAAAGTGGACCAATCA       | Porro et al, 2010     |
| <b>16p-F</b>   | TGTGTTTCAACGCTGCAACTG        | Diman et al, 2016     |
| <b>16p-R</b>   | AGTTAGAACGGTTCAGTGTG         | Diman et al, 2016     |
| <b>5p-F</b>    | GAGTGCATTAGCATAACAGGTG       | Diman et al, 2016     |
| <b>5p-R</b>    | TCCTAATGCACACGTAACAC         | Diman et al, 2016     |
| <b>15q-F</b>   | CAGCGAGATTCTCCCAAGCTAAG      | Porro et al, 2010     |
| <b>15q-R</b>   | AACCCTAACCACATGAGCAACG       | Porro et al, 2010     |

## Supplementary References

- Abreu E, Aritonovska E, Reichenbach P, Cristofari G, Culp B, Terns RM, Lingner J, Terns MP (2010) TIN2-tethered TPP1 recruits human telomerase to telomeres in vivo. *Mol Cell Biol* 30:2971-82
- Ansel KM, Pastor WA, Rath N, Lapan AD, Glasmacher E, Wolf C, Smith LC, Papadopoulou N, Lamperti ED, Tahiliani M, Ellwart JW, Shi Y, Kremmer E, Rao A, Heissmeyer V (2008) *Nat Struct Mol Biol* 15:523-30
- Boros J, Arnoult N, Stroobant V, Collet JF, Decottignies A (2014) Polycomb repressive complex 2 and H3K27me3 cooperate with H3K9 methylation to maintain heterochromatin protein 1 $\alpha$  at chromatin. *Mol Cell Biol* 34:3662-74
- Diman A, Boros J, Poulain F, Rodriguez J, Purnelle M, Episkopou H, Bertrand L, Francaux M, Deldicque L, Decottignies A (2016) Nuclear respiratory factor 1 and endurance exercise promote human telomere transcription. *Sci Adv* 2:e1600031
- Ecoffier E, Rezza A, Roborel de Climens A, Belleville A, Gazzolo L, Gilson E, Duc Dodon M (2005) A balanced transcription between telomerase and the telomeric DNA-binding proteins TRF1, TRF2 and Pot1 in resting, activated, HTLV-1-transformed and Tax-expressing human T lymphocytes. *Retrovirol* 2: 77
- Jonstrup AT, Andersen KR, Van LB, Brodersen DE (2007) The 1.4-Å crystal structure of the *S. pombe* Pop2p deadenylase subunit unveils the configuration of an active enzyme. *Nucleic Acids Res* 35: 3153-64
- Lin X, Gu J, Lu C, Spitz MR, Wu X (2006) Expression of telomere-associated genes as prognostic markers for overall survival in patients with non-small cell lung cancer. *Clin Cancer Res* 12: 572
- Liu J-L, Zeng G-Z, Liu X-L, Liu Y-Q, Hu Z-G, Liu Y, Tan N-H, Zhou G-B (2013) Small compound bigelovin exerts inhibitory effects and triggers proteolysis of E2F1 in multiple myeloma cells. *Cancer Sci* 104: 1697-704
- Liu Y, Zhang X, Han C, Wan G, Huang X, Ivan C, Jiang D, Rodriguez-Aguayo C, Lopez-Berestein G, Rao PH, Maru DM, Pahl A, He X, Sood AK, Ellis LM, Anderl J, Lu X (2015) TP53 loss creates therapeutic vulnerability in colorectal cancer. *Nature* 520:697-701
- Montellese C, Montel-Lehry N, Henras AK, Kutay U, Gleizes PE, O'Donohue MF (2017) Poly(A)-specific ribonuclease is a nuclear ribosome biogenesis factor involved in human 18S rRNA maturation. *Nucleic Acids Res* 45: 6822-36
- O'Donohue MF, Choemel V, Faubladiet M, Fichant G, Gleizes PE (2010) Functional dichotomy of ribosomal proteins during the synthesis of mammalian 40S ribosomal subunits. *J Cell Biol* 190:853-66
- Pettersen EF, Goddard TD, Huang CC, Cough GS, Greenblatt DM, Meng EC, Ferrin TE (2004) UCSF Chimera—a visualization system for exploratory research and analysis. *J Comput Chem* 25:1605-12
- Poncet D, Belleville A, t'kint de Roodenbeke C, Roborel de Climens A, Ben Simon E, Merle-Beral H, Callet-Bauchu E, Salles G, Sabatier L, Delic J, Gilson E (2008) Changes in the expression of telomere maintenance genes suggest global telomere dysfunction in B-chronic lymphocytic leukemia. *Blood* 111: 23888-91
- Porro A, Feuerhahn S, Reichenbach P, Lingner J (2010) Molecular dissection of telomeric repeat-containing RNA biogenesis unveils the presence of distinct and multiple regulatory pathways. *Mol Cell Biol* 30: 4808-17
- Tilman G, Lorient A, Van Beneden A, Arnoult N, Londono-Vallejo JA, De Smet C, Decottignies A (2009) Subtelomeric DNA hypomethylation is not required for telomeric sister chromatid exchanges in ALT cells. *Oncogene* 28: 1682-93

-Tummala H, Walne A, Collopy L, Cardoso S, de la Fuente J, Lawson S, Powell J, Cooper N, Foster A, Mohammed S, Plagnol V, Vulliamy T, Dokal I (2015) Poly(A)-specific ribonuclease deficiency impacts telomere biology and causes dyskeratosis congenita. *J Clin Invest* 125: 2151-60

-Wu M, Reuter M, Lilie H, Liu Y, Wahle E, Song H (2005) Structural insight into poly(A) binding and catalytic mechanism of human PARN. *EMBO J* 24: 4082-93

-Zaffaroni N, Villa R, Pastorino U, Cirincione R, Incarbone M, Alloisio M, Curto M, Pilotti S, Daidone MG (2005) Lack of telomerase activity in lung carcinoids is dependent on human telomerase reverse transcriptase transcription and alternative splicing is associated with long telomeres. *Clin Cancer Res* 11: 2832-9
