# Supplementary material for: Impaired telomere integrity and rRNA biogenesis in PARN‐deficient patients and knock‐out models
Source: PubMed Central journal article supplement (PMC6609912; doi:10.15252/emmm.201810201), 2019-06-06

Figure 1G

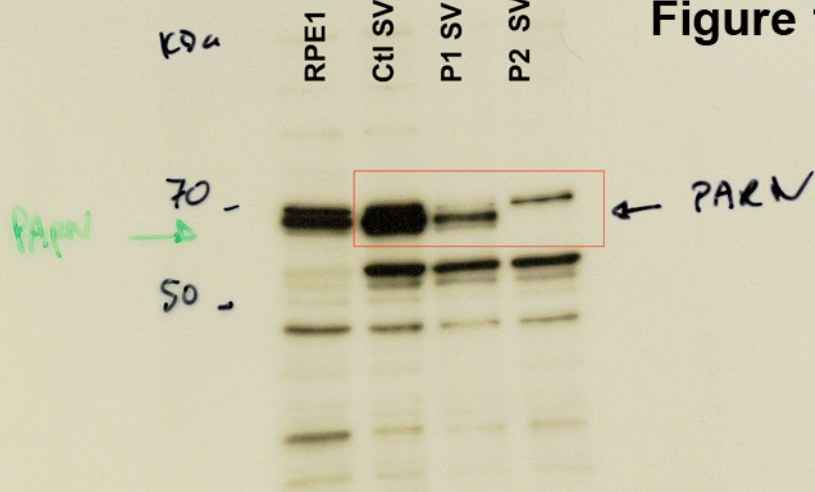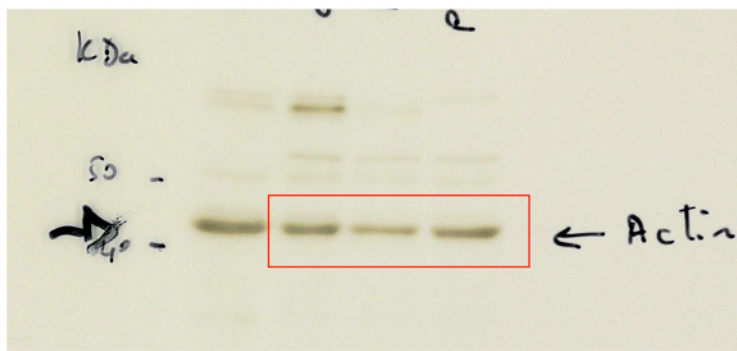

Supplement: EMMM-11-e10201-s002.pdf [file EMMM-11-e10201-s002.pdf]
