# Supplementary material for: Impaired telomere integrity and rRNA biogenesis in PARN‐deficient patients and knock‐out models
Source: PubMed Central journal article supplement (PMC6609912; doi:10.15252/emmm.201810201), 2019-06-06
Supplement: EMMM-11-e10201-s008.pdf [file EMMM-11-e10201-s008.pdf]

## Impaired telomere integrity and rRNA biogenesis in PARN-deficient patients and knock-out models

Maname Benyelles, Harikleia Episkopou, Marie-Françoise O'Donohue, Laëtitia Kermasson, Pierre Frange, Florian Poulain, Fatma Burcu Belen, Meltem Polat, Christine Bole-Feysot, Francina Langa-Vives, Pierre-Emmanuel Gleizes, Jean-Pierre de Villartay, Isabelle Callebaut, Anabelle Decottignies, Patrick Revy

---

### Review timeline:

|                     |                  |
|---------------------|------------------|
| Submission date:    | 13 December 2018 |
| Editorial Decision: | 7 February 2019  |
| Revision received:  | 28 February 2019 |
| Editorial Decision: | 10 April 2019    |
| Revision received:  | 24 April 2019    |
| Accepted:           | 9 May 2019       |

---

Editor: Céline Carret

### Transaction Report:

(Note: With the exception of the correction of typographical or spelling errors that could be a source of ambiguity, letters and reports are not edited. The original formatting of letters and referee reports may not be reflected in this compilation.)

---

1st Editorial Decision

7 February 2019

Thank you for the submission of your manuscript to EMBO Molecular Medicine. We have now heard back from the three referees whom we asked to evaluate your manuscript.

You will see from the comments pasted below that Referees #1 and #2 are supportive of publication while Referee #3 raises an important concern as novelty being compromised. Referee #2 also regrets that the paper only provides weak mechanistic insights and this aspect of the study should be improved. As we do like the translational potentials highlighted in your work, we would like to encourage you to address the mechanistic issues, knowing that this would increase the novelty of the findings. In addition, we would like to ask you to thoroughly discuss the papers commented by Referee #3.

We would therefore welcome the submission of a revised version within three months for further consideration and would like to encourage you to address all the criticisms raised as suggested to improve conclusiveness and clarity. Please note that EMBO Molecular Medicine strongly supports a single round of revision and that, as acceptance or rejection of the manuscript will depend on another round of review, your responses should be as complete as possible.

EMBO Molecular Medicine has a "scooping protection" policy, whereby similar findings that are published by others during review or revision are not a criterion for rejection. Should you decide to submit a revised version, I do ask that you get in touch after three months if you have not completed it, to update us on the status.

Please also contact us as soon as possible if similar work is published elsewhere. If other work is published we may not be able to extend the revision period beyond three months.

Please read below for important editorial formatting and consult our author's guidelines for proper formatting of your revised article for EMBO Molecular Medicine.

I look forward to receiving your revised manuscript.

\*\*\*\*\* Reviewer's comments \*\*\*\*\*

Referee #1 (Remarks for Author):

Benyelles et al. describe the pleiotropic consequences of bilallelic pathogenic PARN mutations in telomere metabolism and rRNA biogenesis in two unrelated patients with Høyeraal-Hreidarsson syndrome. They found that, in addition to critical telomere shortening, patients' cells also display down regulation of a series of sheltering proteins (TRF1, TRF2, TPP1, RAP1, and POT1), which is rescued in PARN-deficient cell lines by inducible PARN expression. They also show that ribosomal RNA biogenesis in human fibroblasts from patients and heterozygous Parn KO mice. Experiments are consistent and well conducted and conclusions are well supported by data. I have only minor comments.

- 1) line 69: Høyeraal-Hreidarsson syndrome is not the most severe clinical variant of telomeropathies, but rather Revesz syndrome (Alter et al. 2012)
- 2) Gene names should be italicized.
- 3) line 110: Bone marrow aspirate does not demonstrate pancytopenia. Pancytopenia is diagnosed in peripheral blood.
- 4) line: line 120: likewise, marrow aspirate does not demonstrate marrow cellularity, which is usually assessed by BM biopsy.
- 5) line 166: It is interesting that patients did not present somatic TERT promoter variants. It has recently been shown that these variants are restricted to patients with either TERT or TERC germline mutations (Gutierrez-Rodriguez, 2018).
- 6) What is the explanation of hTR mislocalization to the cytoplasm? Is it the result of abnormal poly(A) tails? In these instances, is hTR detached from hTERT?

Referee #2 (Comments on Novelty/Model System for Author):

The technical quality of this work is strong based on the visually apparent quality of gels, magnitude of biological effects (both absolute and relative), and the extent of quantitation and statistical tests.

The novelty of this work is good because the study of PARN is still a relatively new topic in the telomere field, and the progress made by the authors that is reported in this manuscript is substantial.

The medical impact is important given this is major mechanistic progress on the study of "telomeropathies" that are rare but often severe. Such diseases and disease mechanisms are an emerging field that spans multiple clinical fields.

The model system is patient samples and the mouse, and the results are clearly synergistic and complementary.

Referee #2 (Remarks for Author):

This work describes substantial new genetic insights into the role of PARN in the severe human telomeropathy, Hoyeraal-Hreidarsson (HH) syndrome. The study is important given the pinpointing of the specific gene mutations causing diseases in two patients, who were evaluated extensively. The data quality is very high, and the experiments are well-conceived and executed. The work lays the foundation for future study to understand how PARN operates and underlies this disease in molecular-mechanistic terms (it does not advance the study of PARN mechanism substantially per se). Overall, this is a very solid, innovative research study, about which I became increasingly enthusiastic as I read the authors' manuscript.

That said, there is room for substantial improvement without extensive additional work. Foremost, the authors need to make it clearer what they believe their data add, if anything, regarding the mechanistic role of PARN in regulating hTR ncRNA and Shelterin-component mRNAs throughout the text (particularly by introducing this more extensively and then revisiting it in the Discussion and Abstract). If the authors do not conclude much about the mechanism(s) based on their data, then they alternatively need to explain in the Abstract and Discussion clearly that such questions as to how PARN is operating in regulating these RNAs remains largely unknown. As it stands presently, the key question of mechanism as to how PARN regulates these transcripts is left under-addressed, and this leaves the story, as written, more descriptive and less impactful than it could be if the authors commented further on this question as to PARN's functional activities.

Regardless of the degree to which the authors believe their data inform understanding of PARN mechanism, the Introduction also needs to inform the reader as to the current status of this question, beyond what is essentially just a single sentence (line 78 of page 3). Additionally, the authors should be clearer on line 83 of p. 4 as to what "modification" by PARN is being referred to: is it RNA nucleolytic cleavage or might this refer to some alternatively possible/known PARN enzymatic action beyond cleaving RNA?

Related to mechanism and functional relationships between PARN and its telomere-affecting targets, Figure 8 could be improved. Is it really necessary to show the same model twice; one for functional PARN and one for dysfunctional? I would think this could be illustrated more cogently, and perhaps (related to the above paragraphs) convey some information as to what specific mechanistic action by PARN is required for each of its promoting and inhibiting effects on the listed targets.

Finally, the authors do not really expand upon how novel the "pleiotropy" that they claim in the title, abstract, Discussion, etc. is for the field, nor precisely how they define it with respect to its targets and positive and negative roles that PARN has on them. The manuscript would be improved by the authors further expanding on why they decided this title was the most compelling by explaining if/why this is a new finding, and precisely in what respects.

Referee #3 (Remarks for Author):

The authors have identified two unrelated Hoyeraal-Hreidarsson individuals carrying novel biallelic PARN mutations. Using PARN-mutated cells from patients and a human PARN KO cell line with inducible PARN complementation, Benyelles and coworkers have found that PARP deficiency affects both the length and the stability of the telomere, reduces the mRNA levels of a subset of shelterins and of DKC1 and present aberrant ribosomal RNA biogenesis. The authors also generated a KO mice, which is embryonic lethal. The heterozygous mice also exhibit aberrant ribosomal RNA biogenesis.

Main concern

Although the different models (from patients, cells and mice) used in this work show robust and well-correlated results, the authors' findings are just the confirmation of previous published works. Thus, PARP deficiency in patients was reported to be accompanied by telomere defects several times already (Burris et al., 2016; Dhanraj et al., 2015; Moon et al., 2015; Tummala et al., 2015). Transient depletion of human PARN was also reported to be associated with a down-regulation of DKC1, RTEL1 and TRF1 transcripts (TUMmala et al., 2015) and, similarly, experiments in mouse myoblast reported a decrease abundance of Terf1, Terf2 and Rtel1 gene transcripts (Lee et al. 2012). Moreover, PARN-depleted cell lines present aberrant ribosomal RNA biogenesis (Ishikawa et al., 2017; Montellese et al., 2017). Because of all the above, I think the work from Benyelles and coworkers lacks of enough novelty to be published in EMBO Mol. Med.

## \*\*\*\*\* Reviewer's comments \*\*\*\*\*

## Referee #1 (Remarks for Author):

Benyelles et al. describe the pleiotropic consequences of bilallelic pathogenic PARN mutations in telomere metabolism and rRNA biogenesis in two unrelated patients with Høyeraal-Hreidarsson syndrome. They found that, in addition to critical telomere shortening, patients' cells also display down regulation of a series of sheltering proteins (TRF1, TRF2, TPP1, RAP1, and POT1), which is rescued in PARN-deficient cell lines by inducible PARN expression. They also show that ribosomal RNA biogenesis in human fibroblasts from patients and heterozygous Parn KO mice. Experiments are consistent and well conducted and conclusions are well supported by data. I have only minor comments.

We thank the reviewer for his/her enthusiastic appreciation of our manuscript and suggestions. We provide point-by-point responses below.

1) line 69: Høyeraal-Hreidarsson syndrome is not the most severe clinical variant of telomeropathies, but rather Revesz syndrome (Alter et al. 2012)

→ We agree with the comment that both HH and Revesz represent extreme severe variants of Dyskeratosis congenita. We replaced the sentence by (page 3): "HH syndrome and Revesz syndrome are rare disorders that represent the most severe clinical variants of DC (Alter, Rosenberg et al., 2012, Glousker et al., 2015)."

2) Gene names should be italicized.

→ We carefully verified that gene names, but not protein names, are all italicized.

3) line 110: Bone marrow aspirate does not demonstrate pancytopenia. Pancytopenia is diagnosed in peripheral blood.

→ We thank the reviewer for this remark. This mistake has been corrected accordingly.

4) line: line 120: likewise, marrow aspirate does not demonstrate marrow cellularity, which is usually assessed by BM biopsy.

→ Again, we thank the reviewer for pointing that out. This mistake has been corrected accordingly.

5) line 166: It is interesting that patients did not present somatic *TERT* promoter variants. It has recently been shown that these variants are restricted to patients with either *TERT* or *TERC* germline mutations (Gutierrez-Rodriguez, 2018).

→ Gutierrez-Rodriguez et al. indeed recently reported somatic *hTERT* promoter-activating mutations in patients harbouring germline *hTERT* or *hTERC* mutations. However, Maryoung et al. (2017) reported the presence of clones carrying somatic *hTERT* promoter-activating mutation in a patient with a heterozygous germline *PARN* mutation. Based on this observation, we tested whether somatic *hTERT* promoter-activating mutation could be detected in our patients but did not detect any. We added the reference "Gutierrez-Rodriguez et al. 2018" that was not included in our former manuscript.

6) What is the explanation of *hTR* mislocalization to the cytoplasm? Is it the result of abnormal poly(A) tails? In these instances, is *hTR* detached from *hTERT*?

→ According to the model proposed by Shukla et al (Nat Struct Mol Biol 2016), there is a competition between *hTR* assembly (H/ACA and snoRNP proteins), 3' end processing by PAPD5 poly(A) polymerase and PARN deadenylase and degradation by EXOSC10 (exosome) on one hand and cytoplasmic export and degradation by DCP2 and XRN1 on the other hand. Upon depletion of either DKC1 or PARN, *hTR* is destabilized and mislocalized to cytoplasmic foci. Proper localization of *hTR* to Cajal bodies can however be recovered by EXOSC10 depletion in PARN- or DKC1-depleted cells, suggesting that this is not the PARN depletion *per se* that is responsible for the mislocalization, but the destabilization of *hTR*.

We have added the following sentences in the introduction (page 4) to better explain the impact of PARN depletion on *hTR* localization in the cells: "Moreover, in the absence of PARN, the residual *hTR* was mislocalized into cytoplasmic foci. As exosome inactivation rescued *hTR* localization into Cajal bodies of PARN-depleted cells, it was suggested that PARN is not directly involved in *hTR*

localization into Cajal bodies but that the mislocalization results from an increased instability of hTR RNA in these cells (Shukla et al, 2016).”

Referee #2 (Comments on Novelty/Model System for Author):

The technical quality of this work is strong based on the visually apparent quality of gels, magnitude of biological effects (both absolute and relative), and the extent of quantitation and statistical tests. The novelty of this work is good because the study of PARN is still a relatively new topic in the telomere field, and the progress made by the authors that is reported in this manuscript is substantial. The medical impact is important given this is major mechanistic progress on the study of "telomeropathies" that are rare but often severe. Such diseases and disease mechanisms are an emerging field that spans multiple clinical fields.

The model system is patient samples and the mouse, and the results are clearly synergistic and complementary.

We thank the reviewer for his/her enthusiastic appreciation of our manuscript.

Referee #2 (Remarks for Author):

This work describes substantial new genetic insights into the role of PARN in the severe human telomeropathy, Høyermaal-Hreidarsson (HH) syndrome. The study is important given the pinpointing of the specific gene mutations causing diseases in two patients, who were evaluated extensively. The data quality is very high, and the experiments are well-conceived and executed. The work lays the foundation for future study to understand how PARN operates and underlies this disease in molecular-mechanistic terms (it does not advance the study of PARN mechanism substantially *per se*). Overall, this is a very solid, innovative research study, about which I became increasingly enthusiastic as I read the authors' manuscript.

We thank the reviewer for his/her enthusiastic appreciation of our manuscript and suggestions. We provide point-by-point responses below.

That said, there is room for substantial improvement without extensive additional work. Foremost, the authors need to make it clearer what they believe their data add, if anything, regarding the mechanistic role of PARN in regulating hTR ncRNA and Shelterin-component mRNAs throughout the text (particularly by introducing this more extensively and then revisiting it in the Discussion and Abstract). If the authors do not conclude much about the mechanism(s) based on their data, then they alternatively need to explain in the Abstract and Discussion clearly that such questions as to how PARN is operating in regulating these RNAs remains largely unknown. As it stands presently, the key question of mechanism as to how PARN regulates these transcripts is left under-addressed, and this leaves the story, as written, more descriptive and less impactful than it could be if the authors commented further on this question as to PARN's functional activities.

Regardless of the degree to which the authors believe their data inform understanding of PARN mechanism, the Introduction also needs to inform the reader as to the current status of this question, beyond what is essentially just a single sentence (line 78 of page 3). Additionally, the authors should be clearer on line 83 of p. 4 as to what "modification" by PARN is being referred to: is it RNA nucleolytic cleavage or might this refer to some alternatively possible/known PARN enzymatic action beyond cleaving RNA?

→ We agree with the reviewer that our results do not provide *per se* mechanistic insights into the role of PARN in hTR and telomere-related gene regulation. We are confident however that the novel findings of our study are significant enough to justify a publication in *EMBO Molecular Medicine*. They can be summarized as follows:

- description of three **novel** germline *PARN* mutations causing Høyermaal-Hreidarsson syndrome
- exhaustive clinical description of two unrelated patients
- demonstration that telomeres in fibroblasts from patients exhibit not only reduced telomere length and deprotection (TIF), but also, **for the first time**, increased instability
- **first** demonstration that short-term complementation of PARN KO human cells rescues telomere instability independently of any restoration of telomere length
- **first** demonstration that PARN depletion reduces the steady-state mRNA levels of human *TRF1*, *TRF2*, *TPP1*, *RAP1* and *POT1* shelterin genes independently of p53

- **first** demonstration that PARN depletion reduces the steady-state mRNA levels of human *DKC1* in a p53-dependent manner
- **first** demonstration that PARN does not regulate human TERRA levels
- **first** demonstration that PARN deficiency in HH patient-derived cells impairs rRNA biogenesis
- **first** demonstration that Parn haploinsufficiency in MEFs impairs rRNA biogenesis
- **first** demonstration that Parn KO mice are embryonic lethal at a very early stage and that the lethality is not reverted by p53 KO

On the other hand, we fully agree that, in its initial form, our manuscript was not helping the reader to appreciate the novelty of the findings and this is why, as the reviewer suggested, we considerably expanded the introduction to clarify the state-of-the-art in the field and the remaining open questions. We, as well, made corresponding changes in the abstract and the discussion to account for this remark.

As suggested by the reviewer we have also completed the introduction to detail the known activities exerted by PARN. We invite the reviewer to read the revised manuscript in order to appreciate the numerous changes that we made.

Related to mechanism and functional relationships between PARN and its telomere-affecting targets, Figure 8 could be improved. Is it really necessary to show the same model twice; one for functional PARN and one for dysfunctional? I would think this could be illustrated more cogently, and perhaps (related to the above paragraphs) convey some information as to what specific mechanistic action by PARN is required for each of its promoting and inhibiting effects on the listed targets.

→ According to the reviewer's suggestion, we modified Figure 8 by showing the model only once and by specifying, for each target, how PARN acts. We believe that this revised figure is much better and self-explanatory.

Finally, the authors do not really expand upon how novel the "pleiotropy" that they claim in the title, abstract, Discussion, etc. is for the field, nor precisely how they define it with respect to its targets and positive and negative roles that PARN has on them. The manuscript would be improved by the authors further expanding on why they decided this title was the most compelling by explaining if/why this is a new finding, and precisely in what respects.

→ We used the term "pleiotropic" in the title of our manuscript to highlight that PARN deficiency does not only cause telomere length defect, but also telomere instability and impaired rRNA biogenesis. However, it appears that the notion of "pleiotropic roles" is misleading and perhaps not well adapted. We therefore modified the title as follows: "Impaired telomere integrity and rRNA biogenesis in PARN-deficient patients and knock-out models". We have, as well, changed the text at various places to take this comment into account, mostly by referring to the pleiotropic consequences of PARN dysfunction, instead of the pleiotropic roles of the protein.

Referee #3 (Remarks for Author):

The authors have identified two unrelated Hoyeraal-Hreidarsson individuals carrying novel biallelic PARN mutations. Using PARN-mutated cells from patients and a human PARN KO cell line with inducible PARN complementation, Benyelles and coworkers have found that PARN deficiency affects both the length and the stability of the telomere, reduces the mRNA levels of a subset of shelterins and of *DKC1* and present aberrant ribosomal RNA biogenesis. The authors also generated a KO mice, which is embryonic lethal. The heterozygous mice also exhibit aberrant ribosomal RNA biogenesis.

Main concern

Although the different models (from patients, cells and mice) used in this work show robust and well-correlated results, the authors' findings are just the confirmation of previous published works. Thus, PARN deficiency in patients was reported to be accompanied by telomere defects several times already (Burris et al., 2016; Dhanraj et al., 2015; Moon et al., 2015; Tummala et al., 2015). Transient depletion of human PARN was also reported to be associated with a down-regulation of *DKC1*, *RTEL1* and *TRF1* transcripts (Tummala et al., 2015) and, similarly, experiments in mouse myoblast reported a decrease abundance of *Terf1*, *Terf2* and *Rtel1* gene transcripts (Lee et al. 2012).

Moreover, PARN-depleted cell lines present aberrant ribosomal RNA biogenesis (Ishikawa et al., 2017; Montellese et al., 2017). Because of all the above, I think the work from Benyelles and coworkers lacks of enough novelty to be published in *EMBO Mol. Med.*

→ We thank the reviewer for his/her positive appreciation of the originality of our models and the robustness of our results.

Although we do regret to read that the reviewer feels that our findings "lack enough novelty to be published in *EMBO Mol. Med.*", we acknowledge that the description of the state-of-the-art was not detailed enough to appreciate the novelty of our findings. We have extensively worked on the Introduction to account for this and we invite the reviewer to read it.

We would like to stress that, to the best of our knowledge, and by using unique cellular models (primary and SV40-transformed PARN-deficient cells from patient, human KO cell line complemented by wtPARN, Parn+/- MEFs), our study reports on several original results that clarify the multiple consequences of PARN deficiency. These hitherto undescribed results, that are of importance for a better understanding of the aetiology of this disease and of the multiple function of PARN, are listed below:

1. Three novel germline *PARN* mutations causing Høyeaal-Hreidarsson syndrome are reported in our manuscript, including p.Q68H (**Figure 1**) affecting an amino-acid extremely conserved across species.
2. We provide an exhaustive clinical description of two unrelated PARN patients with a detailed analysis of the immunologic features (**Table 2**). In particular, our immunological analysis demonstrates in both patients a reduction of circulating naive CD4+ T lymphocytes (CD31+ CD45RA+/CD4+) as well as a decreased in B (CD19+) and NK (CD16+CD56+) cells. To our knowledge, such detailed immunologic features, reporting the peculiar immunodeficiency often observed in HH patients, have not been reported in the previous articles describing PARN-deficient patients.
3. To the best of our knowledge, this is the first time that the analysis of telomere length and stability is performed in primary and transformed fibroblasts from PARN-deficient patients. This approach reveals for the first time that PARN-deficient cells from patients not only exhibit telomere length defect, TIF and senescence but also telomere instability (**Figure 2**).
4. Additionally, by using a human KO cell line complemented or not with wtPARN, we discovered that telomere instability caused by PARN deficiency is independent on telomere length (**Figure 4**). This is an important finding for the understanding of the aetiology of this disease.
5. Using an original set of cell lines (PARN KO cell line +/- complemented), we showed that PARN deficiency leads to a decreased abundance of several telomere-related gene transcripts (**Figure 3H**). This had never been shown before in human cells as Tummala et al. only reported on the impact of transient PARN depletion on the mRNA half-life of telomere-related genes in immortalized human cells, not on the steady-state levels of the transcripts (we have now detailed this in the Introduction). As unexpected results were obtained upon PARN knock-down in mouse myoblasts, where a decrease in transcript abundance could be associated with an increased stability of the affected mRNAs (Lee et al., 2012), the question remained open as to whether PARN defects down-regulate the steady-state levels of human telomere-related gene transcripts. Our findings that PARN KO is indeed associated with a down-regulation of several telomere-related gene transcripts is in agreement with the qRT-PCR results of Tummala et al. showing gene expression in "blood cells" from ctl and HH patients. Importantly enough however, one cannot be sure that these qRT-PCR results were not biased by the differences in blood cell populations. We believe that our model, using a human KO cell line complemented or not with PARN, provides more reliable results. We also showed that the impact of PARN depletion on *TRF1*, *TRF2*, *TPPI*, *RAP1* and *POT1* shelterin gene transcripts was independent on p53.
6. We, on the other hand, showed that the impact of PARN depletion on *DKC1* mRNA levels was dependent on the up-regulation of p53 in PARN KO cells. Again, this had never been showed before.
7. We showed that PARN deficiency does not alter TERRA levels (**Figure 3K**). Since TERRA represents a group of non-coding RNA with crucial role in telomere regulation, this observation provides an important information that had never been addressed before.
8. We (Montallese et al., 2017) and others (Ishikawa et al., 2017) recently reported on the role of PARN in rRNA biogenesis. However, in both articles the experiments were performed

in HeLa cells after PARN depletion with siRNAs. This approach, although informative, is not physiologic and does not prove that pathogenic *PARN* mutations causing HH provoke similar effects on rRNA biogenesis in the patient's cells. For the first time, we provide evidence, in PARN-deficient cells from two unrelated patients, that the rRNA biogenesis is altered (**Figure 6**). These observations were also supported by similar results obtained in PARN KO cell line +/- complemented and Parn+/- MEFs. It is noteworthy that our observation obtained in Parn+/- MEFs provides two supplementary original observations: (i) the role of PARN in rRNA biogenesis is conserved in mouse, (ii) Parn haploinsufficiency (at least in MEFs) impairs rRNA biogenesis (**Figure 7**).

9. We also report the first Parn KO murine animals that are embryonic lethal at a very early stage (**Figure 7**). This observation further supports the notion that the clinical features observed in PARN-deficient patients not only relies on telomere maintenance defect as initially thought (see Discussion).
10. Lastly, we demonstrated that the lethality of Parn KO animals was not reverted by p53 KO (**Figure 7**). Provided that the up-regulation of p53 mRNA and/or protein has been proposed by different studies to be an important contributor to the phenotype, this observation was important and fits with our discovery that the impact of PARN KO on most telomere-related gene transcripts or rRNA biogenesis occurs independently of p53.

---

2nd Editorial Decision

10 April 2019

Thank you for the submission of your revised manuscript to EMBO Molecular Medicine. We have now received the enclosed report from the referee who was asked to re-assess it. As you will see this reviewer is now globally supportive and I am pleased to inform you that we will be able to accept your manuscript pending minor editorial amendments and the text changes requested by Referee #1.

\*\*\*\*\* Reviewer's comments \*\*\*\*\*

Referee #1 (Remarks for Author):

The manuscript has been extensively revised and improved. My comments have been addressed, except for the diagnosis of aplastic anemia, which is still confusing and clinically inaccurate. Line 138: bone marrow aspirate does not show aplastic anemia, as it is not diagnostic. A bone marrow biopsy is required for diagnosis (along with blood counts etc.). I would strongly recommend the authors to revise the diagnosis of patients with the hematologists to make sure the clinical information is accurate.

---

2nd Revision - authors' response

24 April 2019

Authors made the requested changes.



**YOU MUST COMPLETE ALL CELLS WITH A PINK BACKGROUND** ↓

PLEASE NOTE THAT THIS CHECKLIST WILL BE PUBLISHED ALONGSIDE YOUR PAPER

Corresponding Author Name: Patrick Revy & Anabelle Decottignies

Journal Submitted to: EMBO Molecular Medicine

Manuscript Number: EMM-2018-10201V2

### Reporting Checklist For Life Sciences Articles (Rev. June 2017)

This checklist is used to ensure good reporting standards and to improve the reproducibility of published results. These guidelines are consistent with the Principles and Guidelines for Reporting Preclinical Research issued by the NIH in 2014. Please follow the journal's authorship guidelines in preparing your manuscript.

#### A- Figures

##### 1. Data

##### The data shown in figures should satisfy the following conditions:

- the data were obtained and processed according to the field's best practice and are presented to reflect the results of the experiments in an accurate and unbiased manner.
- figure panels include only data points, measurements or observations that can be compared to each other in a scientifically meaningful way.
- graphs include clearly labeled error bars for independent experiments and sample sizes. Unless justified, error bars should not be shown for technical replicates.
- if  $n < 5$ , the individual data points from each experiment should be plotted and any statistical test employed should be justified
- Source Data should be included to report the data underlying graphs. Please follow the guidelines set out in the author ship guidelines on Data Presentation.

##### 2. Captions

##### Each figure caption should contain the following information, for each panel where they are relevant:

- a specification of the experimental system investigated (eg cell line, species name).
- the assay(s) and method(s) used to carry out the reported observations and measurements
- an explicit mention of the biological and chemical entity(ies) that are being measured.
- an explicit mention of the biological and chemical entity(ies) that are altered/ varied/ perturbed in a controlled manner.
- the exact sample size (n) for each experimental group/condition, given as a number, not a range;
- a description of the sample collection allowing the reader to understand whether the samples represent technical or biological replicates (including how many animals, litters, cultures, etc.).
- a statement of how many times the experiment shown was independently replicated in the laboratory.
- definitions of statistical methods and measures:
  - common tests, such as t-test (please specify whether paired vs. unpaired), simple  $\chi^2$  tests, Wilcoxon and Mann-Whitney tests, can be unambiguously identified by name only, but more complex techniques should be described in the methods section;
  - are tests one-sided or two-sided?
  - are there adjustments for multiple comparisons?
  - exact statistical test results, e.g., P values = x but not P values < x;
  - definition of 'center values' as median or average;
  - definition of error bars as s.d. or s.e.m.

Any descriptions too long for the figure legend should be included in the methods section and/or with the source data.

**In the pink boxes below, please ensure that the answers to the following questions are reported in the manuscript itself. Every question should be answered. If the question is not relevant to your research, please write NA (non applicable). We encourage you to include a specific subsection in the methods section for statistics, reagents, animal models and human subjects.**

#### B- Statistics and general methods

Please fill out these boxes ↓ (Do not worry if you cannot see all your text once you press return)

|                                                                                                                                                                                         |                                                                                                                                                                                                                                                                                                                                                                                                                                                                                                                                                                                                                            |
|-----------------------------------------------------------------------------------------------------------------------------------------------------------------------------------------|----------------------------------------------------------------------------------------------------------------------------------------------------------------------------------------------------------------------------------------------------------------------------------------------------------------------------------------------------------------------------------------------------------------------------------------------------------------------------------------------------------------------------------------------------------------------------------------------------------------------------|
| 1.a. How was the sample size chosen to ensure adequate power to detect a pre-specified effect size?                                                                                     | By using G*Power tool , we established that to demonstrate a lethality with crossing of hetXhet animals, with a power of 0.8 and a p value <0.05, 11 animals were required. We obtained in total 96 animals without homo mice, demonstrating the lethality. The same holds true with embryos (15 animals analyzed).                                                                                                                                                                                                                                                                                                        |
| 1.b. For animal studies, include a statement about sample size estimate even if no statistical methods were used.                                                                       | By using G*Power tool , we established that, to demonstrate a lethality with crossing of hetXhet animals, with a power of 0.8 and a p value <0.05, 11 animals were required. We obtained in total 96 animals without homo mice, demonstrating the lethality. The same holds true with embryos (15 animals analyzed).                                                                                                                                                                                                                                                                                                       |
| 2. Describe inclusion/exclusion criteria if samples or animals were excluded from the analysis. Were the criteria pre-established?                                                      | No exclusion. All animals were included in our study.                                                                                                                                                                                                                                                                                                                                                                                                                                                                                                                                                                      |
| 3. Were any steps taken to minimize the effects of subjective bias when allocating animals/samples to treatment (e.g. randomization procedure)? If yes, please describe.                | NA, embryonic lethality                                                                                                                                                                                                                                                                                                                                                                                                                                                                                                                                                                                                    |
| For animal studies, include a statement about randomization even if no randomization was used.                                                                                          | NA, embryonic lethality                                                                                                                                                                                                                                                                                                                                                                                                                                                                                                                                                                                                    |
| 4.a. Were any steps taken to minimize the effects of subjective bias during group allocation or/and when assessing results (e.g. blinding of the investigator)? If yes please describe. | NA, embryonic lethality                                                                                                                                                                                                                                                                                                                                                                                                                                                                                                                                                                                                    |
| 4.b. For animal studies, include a statement about blinding even if no blinding was done                                                                                                | NA, embryonic lethality                                                                                                                                                                                                                                                                                                                                                                                                                                                                                                                                                                                                    |
| 5. For every figure, are statistical tests justified as appropriate?                                                                                                                    | YES, statistical tests have been carefully selected with the help of a statistician in this revised version of the manuscript. The nature of the test used has been described in each corresponding figure legend. The choice of the statistical test was also based on the results obtained for normality (Shapiro-Wilk test) and for variance comparisons between the groups (Bartlett test). For Fig 2I, 2J and 4A, a Chi2 test was applied as the expected number of observations was very high (n: 1400-7800). Details of the statistical analyses are provided in the Source data document.                          |
| Do the data meet the assumptions of the tests (e.g., normal distribution)? Describe any methods used to assess it.                                                                      | YES, when required (Fig 2D, 2F, 3H, 3I), the Shapiro-Wilk test was applied to all data sets and results are provided in the Source data document. For the graph of Fig 2D, normal distribution was not observed (P<0.05). The Bartlett test for comparison of variances was applied that similarly led to exclude the hypothesis of a similarity of variance between the groups. We thus applied the Kruskal-Wallis non-parametric test for data of Fig 2D. For Fig 2I, 2J and 4A, a Chi2 test was applied that does not require any Shapiro-Wilk test. The statistical analyses are detailed in the Source data document. |

#### USEFUL LINKS FOR COMPLETING THIS FORM

<http://www.antibodypedia.com>

<http://1degreebio.org>

<http://www.equator-network.org/reporting-guidelines/improving-bioscience-research-repo>

<http://grants.nih.gov/grants/olaw/olaw.htm>

<http://www.mrc.ac.uk/Ourresearch/Ethicsresearchguidance/Useofanimals/index.htm>

<http://ClinicalTrials.gov>

<http://www.consort-statement.org>

<http://www.consort-statement.org/checklists/view/32-consort/66-title>

<http://www.equator-network.org/reporting-guidelines/reporting-recommendations-for-tur>

<http://datadryad.org>

<http://figshare.com>

<http://www.ncbi.nlm.nih.gov/gap>

<http://www.ebi.ac.uk/ega>

<http://biomodels.net/>

<http://biomodels.net/miriam/>

<http://jij.biochem.sun.ac.za>

[http://oba.od.nih.gov/biosecurity/biosecurity\\_documents.html](http://oba.od.nih.gov/biosecurity/biosecurity_documents.html)

<http://www.selectagents.gov/>

|                                                                                   |                                                                                                                                                                                                                                                                                                                                                                                                           |
|-----------------------------------------------------------------------------------|-----------------------------------------------------------------------------------------------------------------------------------------------------------------------------------------------------------------------------------------------------------------------------------------------------------------------------------------------------------------------------------------------------------|
| Is there an estimate of variation within each group of data?                      | YES, SEM are shown when required and explained in the legend. For Fig 2I, 2J and 4A, a Chi2 test was applied and SEM are thus not relevant.                                                                                                                                                                                                                                                               |
| Is the variance similar between the groups that are being statistically compared? | YES, when required, the Bartlett test was applied to compare the variance between the groups. When P values provided by the Bartlett test were lower than 0.05, the correction for unequal variance was applied for Student's t tests (Excel). For Fig 2I, 2J and 4A, a Chi2 test was applied that does not require any Bartlett test. The statistical analyses are detailed in the Source data document. |

### C- Reagents

|                                                                                                                                                                                                                                                                                                                              |                                                                                                                                                                                                               |
|------------------------------------------------------------------------------------------------------------------------------------------------------------------------------------------------------------------------------------------------------------------------------------------------------------------------------|---------------------------------------------------------------------------------------------------------------------------------------------------------------------------------------------------------------|
| 6. To show that antibodies were profiled for use in the system under study (assay and species), provide a citation, catalog number and/or clone number, supplementary information or reference to an antibody validation profile. e.g., Antibodypedia (see link list at top right), 1DegreeBio (see link list at top right). | Methods section, page 21: catalog numbers and working dilutions for antibodies were provided.                                                                                                                 |
| 7. Identify the source of cell lines and report if they were recently authenticated (e.g., by STR profiling) and tested for mycoplasma contamination.                                                                                                                                                                        | We used primary cells, SV40-transformed cells and the HT1080 cell line that are negative for mycoplasma. All the informations regarding the cell lines are now detailed in the Methods section (see page 18). |

\* for all hyperlinks, please see the table at the top right of the document

### D- Animal Models

|                                                                                                                                                                                                                                                                                                                                                                                    |                                                                                                                                          |
|------------------------------------------------------------------------------------------------------------------------------------------------------------------------------------------------------------------------------------------------------------------------------------------------------------------------------------------------------------------------------------|------------------------------------------------------------------------------------------------------------------------------------------|
| 8. Report species, strain, gender, age of animals and genetic modification status where applicable. Please detail housing and husbandry conditions and the source of animals.                                                                                                                                                                                                      | Informations are provided in the Methods section (see pages 23 and 24).                                                                  |
| 9. For experiments involving live vertebrates, include a statement of compliance with ethical regulations and identify the committee(s) approving the experiments.                                                                                                                                                                                                                 | The experiments were approved by the local ethical committee and the French Ministry of Education and Research (#01501.03). See page 24. |
| 10. We recommend consulting the ARRIVE guidelines (see link list at top right) (PLoS Biol. 8(6), e1000412, 2010) to ensure that other relevant aspects of animal studies are adequately reported. See author guidelines, under 'Reporting Guidelines'. See also: NIH (see link list at top right) and MRC (see link list at top right) recommendations. Please confirm compliance. | NA. Non viable KO animals.                                                                                                               |

### E- Human Subjects

|                                                                                                                                                                                                                                                                                                                    |                                                                                                                                                                                                                                                                                                                                                                                                                                 |
|--------------------------------------------------------------------------------------------------------------------------------------------------------------------------------------------------------------------------------------------------------------------------------------------------------------------|---------------------------------------------------------------------------------------------------------------------------------------------------------------------------------------------------------------------------------------------------------------------------------------------------------------------------------------------------------------------------------------------------------------------------------|
| 11. Identify the committee(s) approving the study protocol.                                                                                                                                                                                                                                                        | "Comité de Protection des personnes d'Ile de France II"                                                                                                                                                                                                                                                                                                                                                                         |
| 12. Include a statement confirming that informed consent was obtained from all subjects and that the experiments conformed to the principles set out in the WMA Declaration of Helsinki and the Department of Health and Human Services Belmont Report.                                                            | Informed and written consent was obtained from donors, patients, and families of patients. The study and protocols comply with the 1975 Declaration of Helsinki as well as with the local legislation and ethical guidelines from the "Comité de Protection des Personnes de l'Ile de France II" and the French advisory committee on data processing in medical research. This has been added in our manuscript (see page 18). |
| 13. For publication of patient photos, include a statement confirming that consent to publish was obtained.                                                                                                                                                                                                        | We obtained a consent from P1 patient's parents to publish the photos (Fig S1). This has been added in the manuscript (see page 18).                                                                                                                                                                                                                                                                                            |
| 14. Report any restrictions on the availability (and/or on the use) of human data or samples.                                                                                                                                                                                                                      | NA                                                                                                                                                                                                                                                                                                                                                                                                                              |
| 15. Report the clinical trial registration number (at ClinicalTrials.gov or equivalent), where applicable.                                                                                                                                                                                                         | NA                                                                                                                                                                                                                                                                                                                                                                                                                              |
| 16. For phase II and III randomized controlled trials, please refer to the CONSORT flow diagram (see link list at top right) and submit the CONSORT checklist (see link list at top right) with your submission. See author guidelines, under 'Reporting Guidelines'. Please confirm you have submitted this list. | NA                                                                                                                                                                                                                                                                                                                                                                                                                              |
| 17. For tumor marker prognostic studies, we recommend that you follow the REMARK reporting guidelines (see link list at top right). See author guidelines, under 'Reporting Guidelines'. Please confirm you have followed these guidelines.                                                                        | NA                                                                                                                                                                                                                                                                                                                                                                                                                              |

### F- Data Accessibility

|                                                                                                                                                                                                                                                                                                                                                                                                                                                                                                                                                                                                                                                                                                  |                                                                                                                                  |
|--------------------------------------------------------------------------------------------------------------------------------------------------------------------------------------------------------------------------------------------------------------------------------------------------------------------------------------------------------------------------------------------------------------------------------------------------------------------------------------------------------------------------------------------------------------------------------------------------------------------------------------------------------------------------------------------------|----------------------------------------------------------------------------------------------------------------------------------|
| 18. Provide a "Data Availability" section at the end of the Materials & Methods, listing the accession codes for data generated in this study and deposited in a public database (e.g. RNA-Seq data: Gene Expression Omnibus GSE39462, Proteomics data: PRIDE PXD000208 etc.) Please refer to our author guidelines for 'Data Deposition'.<br><br>Data deposition in a public repository is mandatory for:<br>a. Protein, DNA and RNA sequences<br>b. Macromolecular structures<br>c. Crystallographic data for small molecules<br>d. Functional genomics data<br>e. Proteomics and molecular interactions                                                                                       | We added a Data availability section in which the sequencing data from this publication have been deposited to the EGA database. |
| 19. Deposition is strongly recommended for any datasets that are central and integral to the study; please consider the journal's data policy. If no structured public repository exists for a given data type, we encourage the provision of datasets in the manuscript as a Supplementary Document (see author guidelines under 'Expanded View' or in unstructured repositories such as Dryad (see link list at top right) or Figshare (see link list at top right).                                                                                                                                                                                                                           | A total of 6 appendix figures and 2 appendix tables are included                                                                 |
| 20. Access to human clinical and genomic datasets should be provided with as few restrictions as possible while respecting ethical obligations to the patients and relevant medical and legal issues. If practically possible and compatible with the individual consent agreement used in the study, such data should be deposited in one of the major public access-controlled repositories such as dbGAP (see link list at top right) or EGA (see link list at top right).                                                                                                                                                                                                                    | We agree. Feasibility and legal issues need to be discussed with our institutions.                                               |
| 21. Computational models that are central and integral to a study should be shared without restrictions and provided in a machine-readable form. The relevant accession numbers or links should be provided. When possible, standardized format (SBML, CellML) should be used instead of scripts (e.g. MATLAB). Authors are strongly encouraged to follow the MIRIAM guidelines (see link list at top right) and deposit their model in a public database such as Biomedels (see link list at top right) or JWS Online (see link list at top right). If computer source code is provided with the paper, it should be deposited in a public repository or included in supplementary information. | NA                                                                                                                               |

### G- Dual use research of concern

|                                                                                                                                                                                                                                                                                               |    |
|-----------------------------------------------------------------------------------------------------------------------------------------------------------------------------------------------------------------------------------------------------------------------------------------------|----|
| 22. Could your study fall under dual use research restrictions? Please check biosecurity documents (see link list at top right) and list of select agents and toxins (APHIS/CDC) (see link list at top right). According to our biosecurity guidelines, provide a statement only if it could. | NA |
|-----------------------------------------------------------------------------------------------------------------------------------------------------------------------------------------------------------------------------------------------------------------------------------------------|----|
